# Supplementary material
Source: PubMed Central journal article supplement (PMC2671706)
Supplement: tpc.108.063164_1.pdf [file tpc.108.063164_1.pdf]

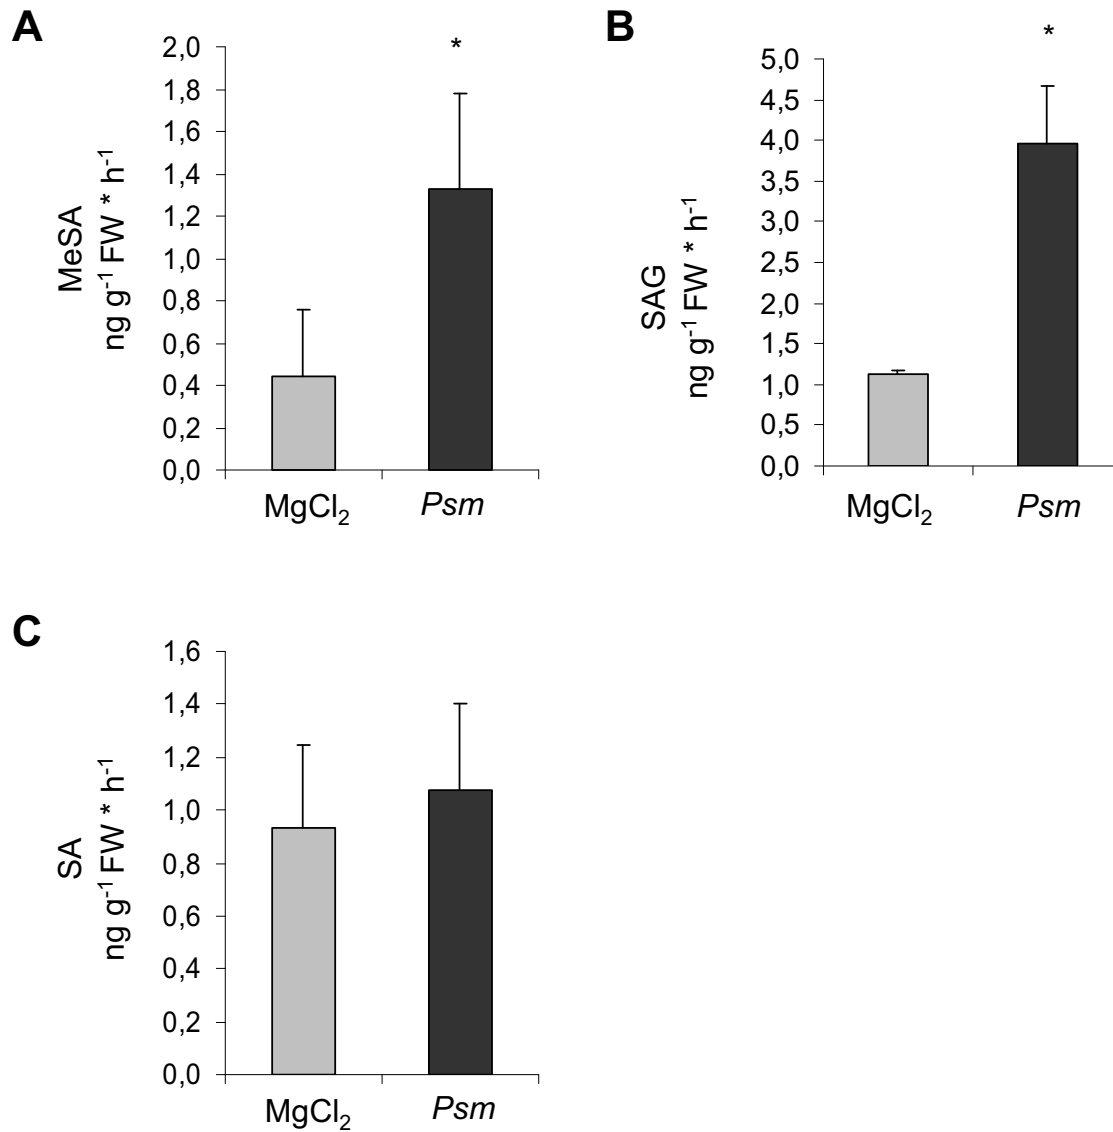

**Supplemental Figure 1.** Petiole exudation of SA derivatives from *P. syringae*- and mock-inoculated Col-0 leaves.

Exudates were collected between 6 and 48 hpi. Values (means  $\pm$  SD, n = 5) represent ng exuded substance g<sup>-1</sup> fresh weight h<sup>-1</sup>. Asterisks denote statistically significant differences between *Psm*- and MgCl<sub>2</sub>-treatments (P < 0.02).

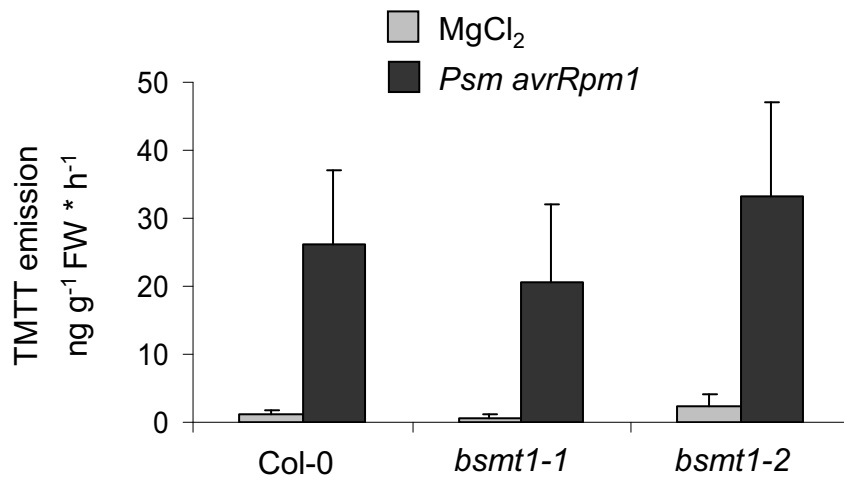

**Supplemental Figure 2.** TMTT emission from wild-type Col-0 and *bsmt1* mutant plants.

Plants were inoculated with *Psm avrRpm1* or infiltrated with MgCl<sub>2</sub>. Volatiles were collected from 0 to 24 hpi. Bars represent mean emission values ( $\pm$  SD, n = 4).

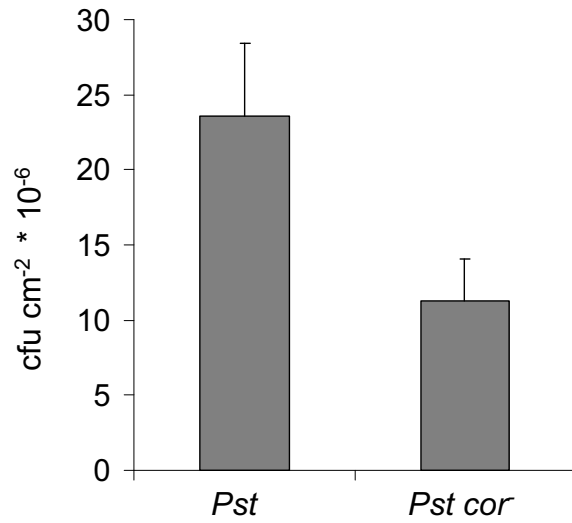

**Supplemental Figure 3.** Growth of *Pst* and *Pst cor* in Col-0 leaves.

Bacterial numbers of *Pst* and *Pst cor* in leaves of Col-0 plants were determined one day after inoculation (OD = 0.01). Bars represent means ( $\pm$  SD) of cfu per cm<sup>2</sup> from six parallel samples from different plants, each sample consisting of three leaf disks.

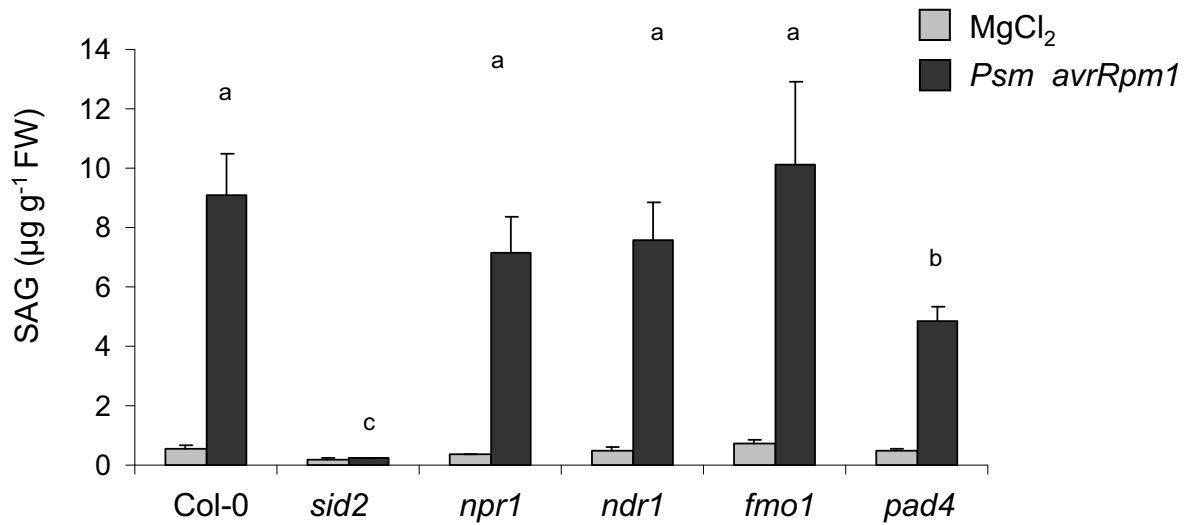

**Supplemental Figure 4.** SAG accumulation in *P. syringae*-treated wild type and SAR-defective mutant plants.

SAG levels in MgCl<sub>2</sub>-infiltrated and *Psm avrRpm1*-inoculated leaves at 24 hpi (means ± SD, n = 3). Different letters symbolize statistically significant differences between *Psm avrRpm1*-treated plants from distinct lines (P < 0.05).
